# Supplementary material
Source: Springer Nature journal article supplement (https://www.springermedizin.de/resource/supplementary/12885_2009_1836_MOESM8_ESM.pdf/9460674)

**A**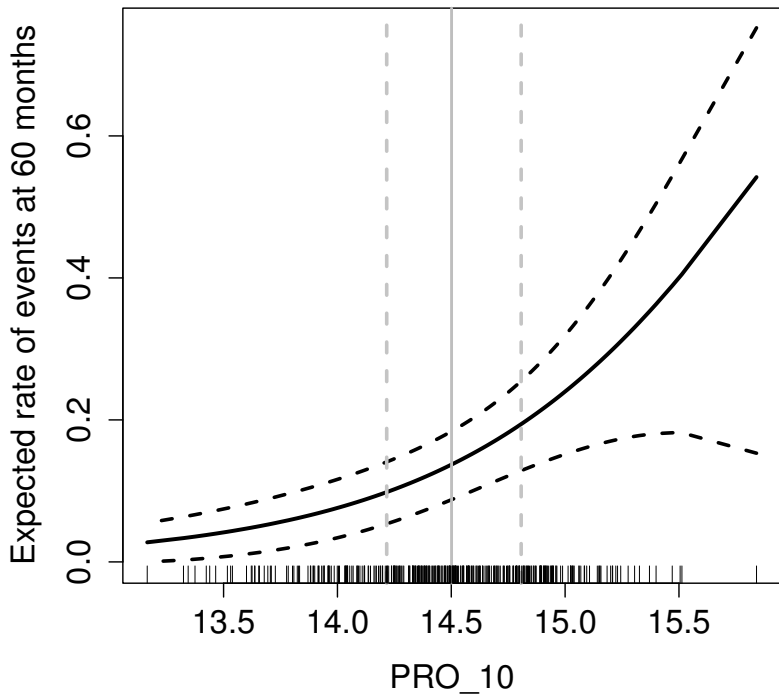**B**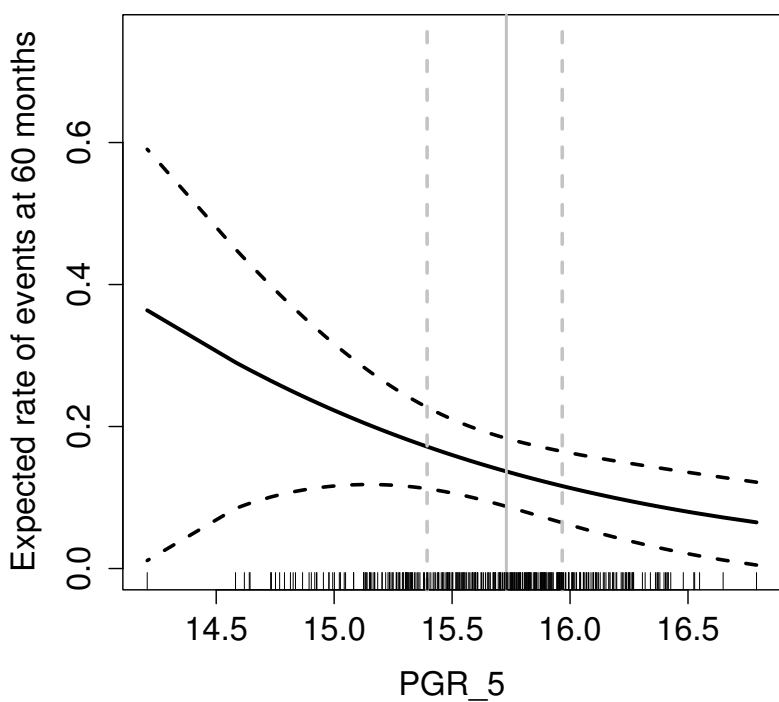**C**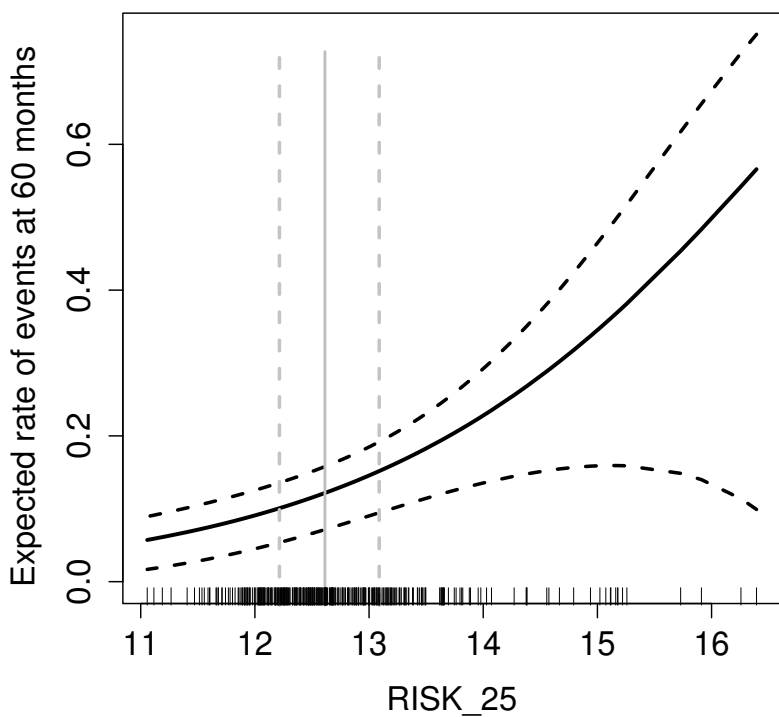

Supplement: MOESM8 [file 9460674]
